# Supplementary material for: Halogen-dependent photoinduced electron transfer and chromism of three protonated nicotinohydrazide halozincates
Source: Royal Society of Chemistry journal article supplement (doi:10.1039/c7dt00457e), 2017-01-01
Supplement: c7dt00457e1.pdf [file c7dt00457e1.pdf]

Electronic Supplementary Information

**Halogen-dependent photoinduced electron transfer and chromism of three protonated nicotinohydrazide halozincates**

Jun-Ju Shen, Feng Wang, Tan-Lai Yu, Fu-Qiang Zhang, Lu Tian and Yun-Long Fu\*

School of Chemistry & Material Science, Shanxi Normal University, Linfen 041004,  
P. R. China

Fax & Tel: Int. code +86 357 2053716; E-mail: [yunlongfu@sxnu.edu.cn](mailto:yunlongfu@sxnu.edu.cn)

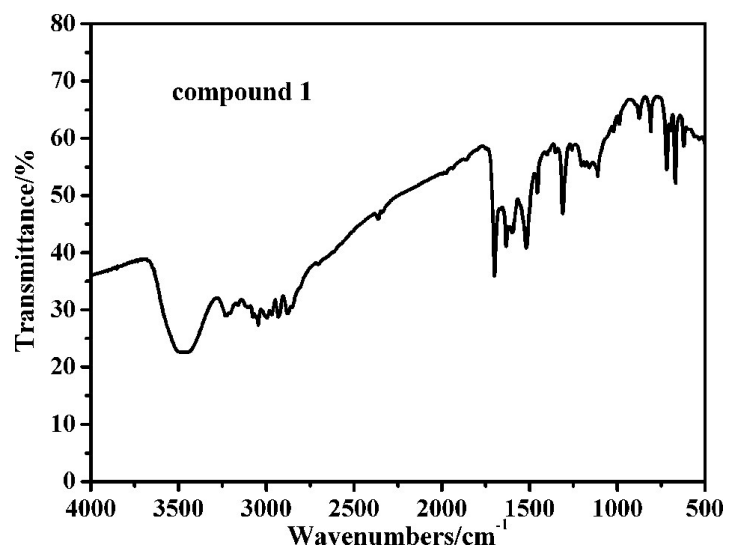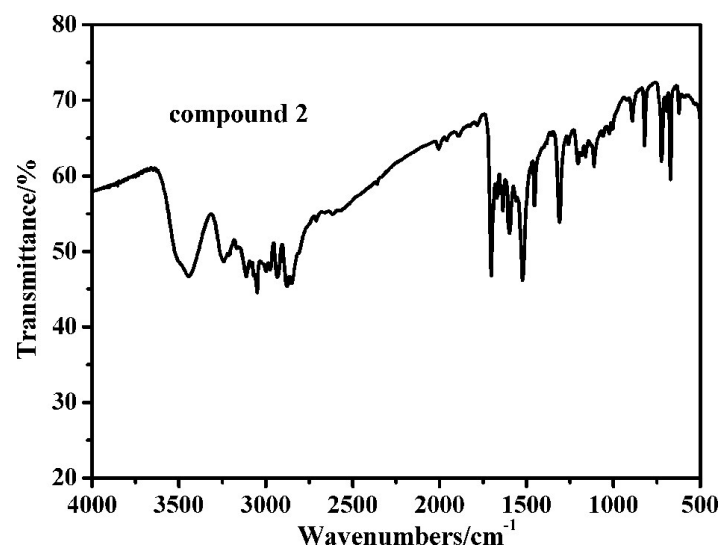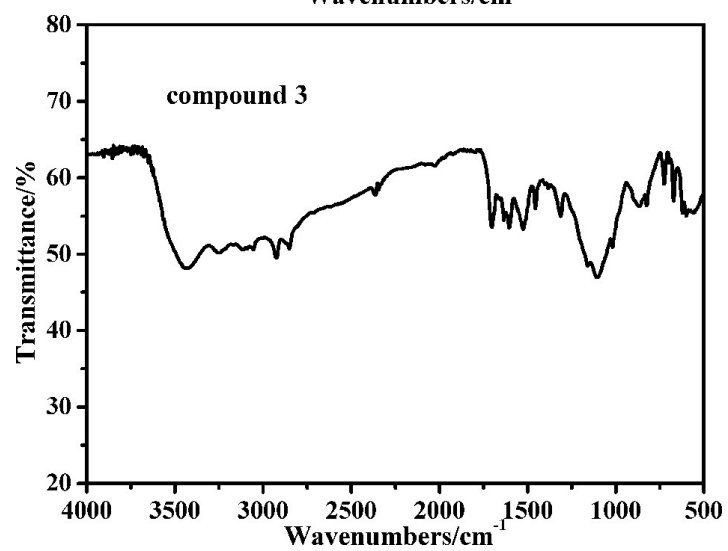

Fig. S1. IR spectra of 1-3.

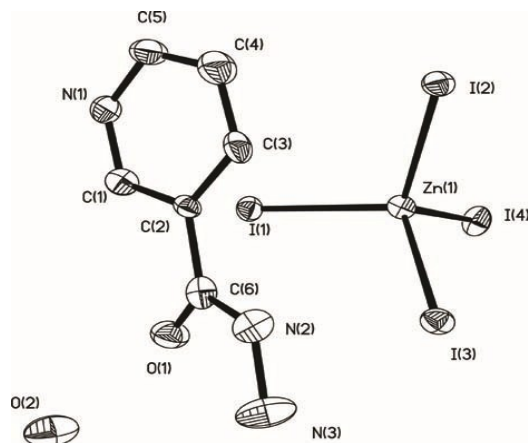

(a)

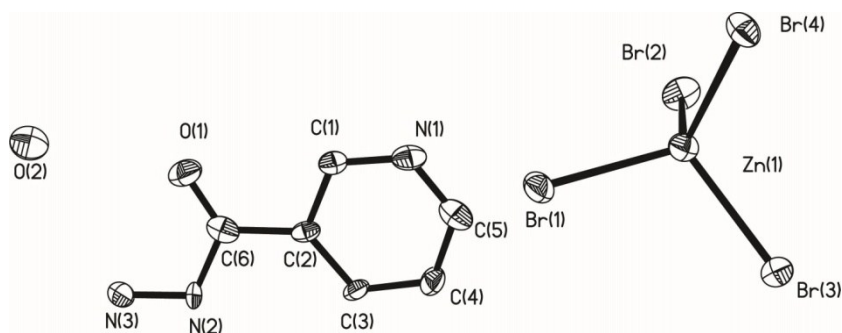

(b)

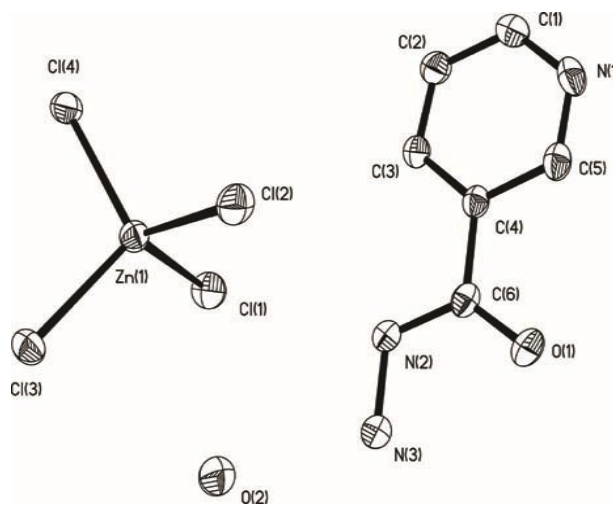

(c)

Fig. S2. The asymmetric unit diagrams of **1** (a), **2** (b) and **3** (c).

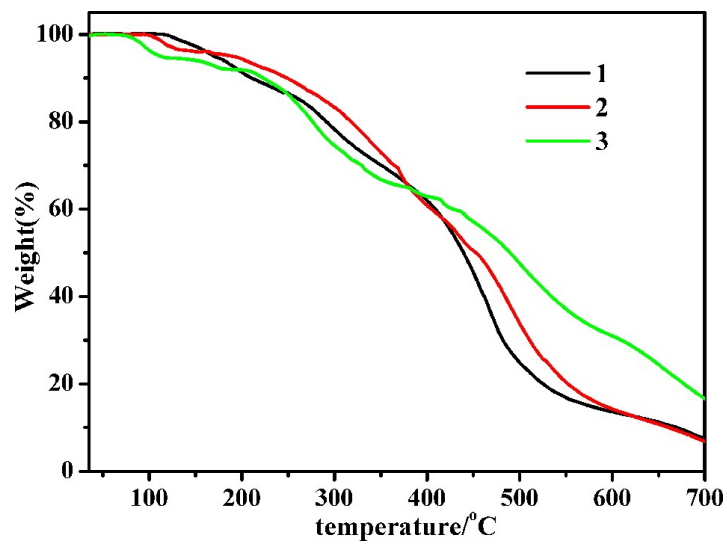

Figure S3. The TGA curves of **1-3**

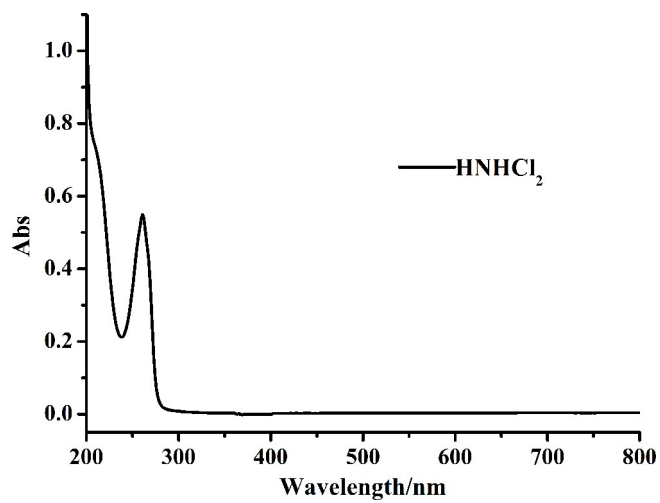

Fig. S4. The UV-vis absorption spectrum of HNHCl<sub>2</sub>.

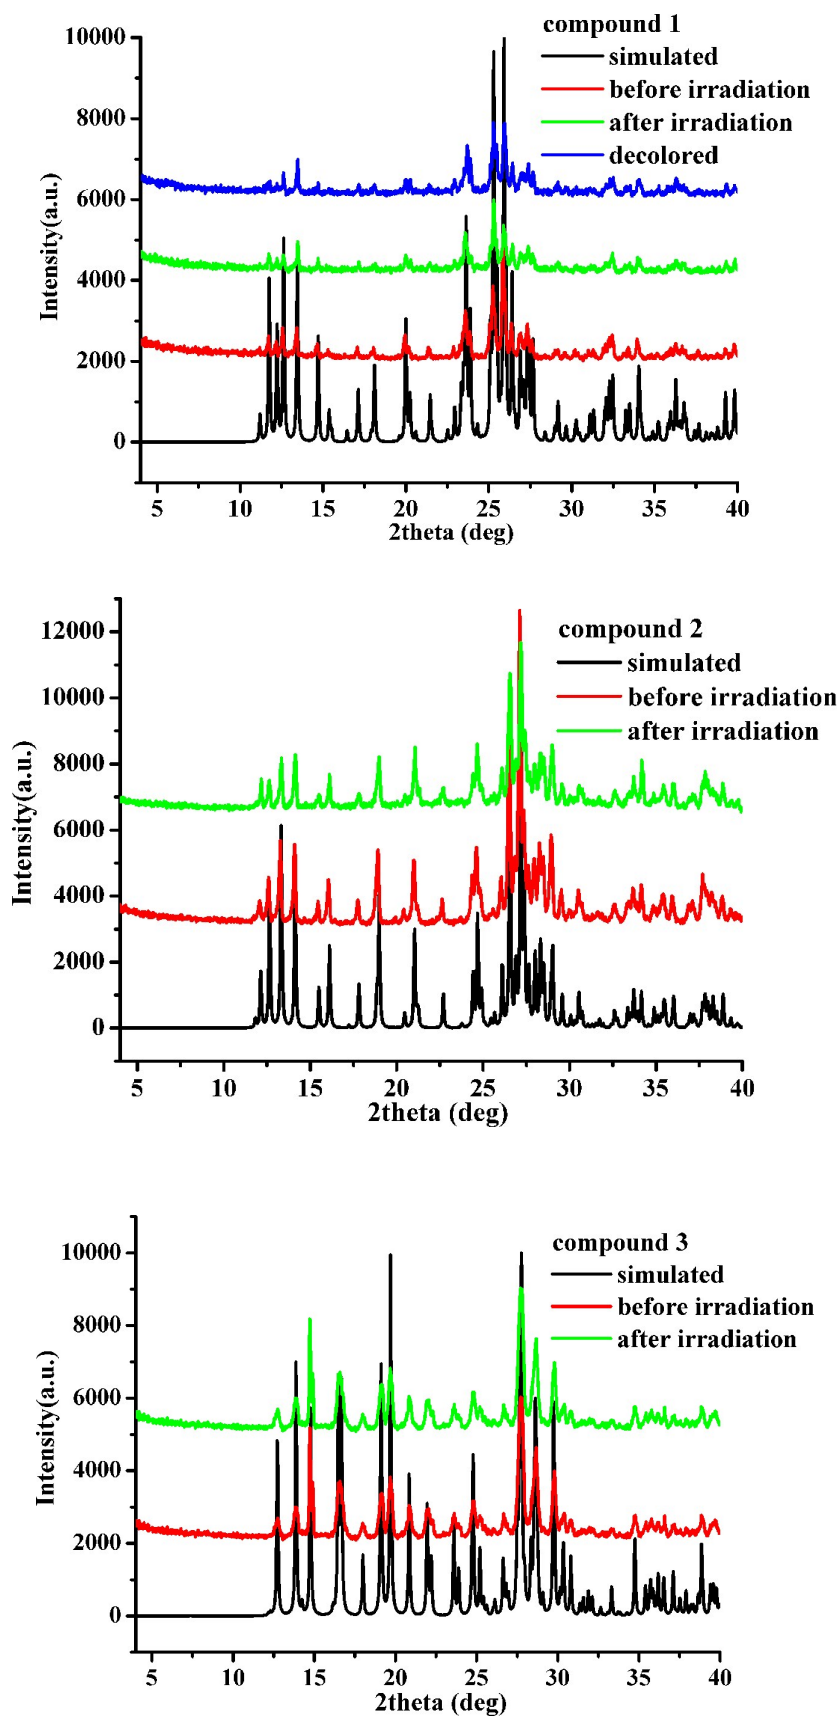

Fig. S5. Powder X-ray diffraction (PXRD) patterns of 1-3.

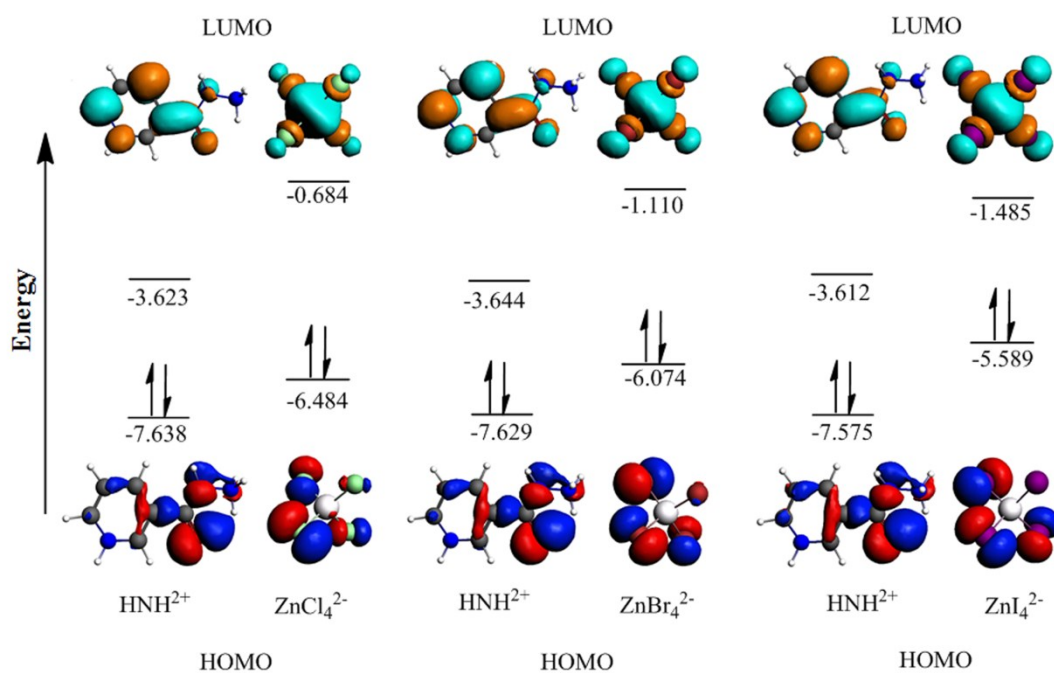

Fig. S6. HOMO and LUMO energy levels of organic HNH<sup>2+</sup> dication and inorganic ZnX<sub>4</sub><sup>2-</sup> anions.

### Molecular orbital calculations

All the calculations were carried out with ADF2016 suite of programs.<sup>1</sup> The exchange and correlation energies were calculated using the PBE density functional. The basis functions were triple- $\xi$  plus polarization Slater basis sets (TZP), in combination with the zero-order regular approximation (ZORA)<sup>2</sup> to account for the scalar relativistic effect. Full geometry optimizations were carried out in the presence of conductor-like screening solvent model (COSMO, acetonitrile).<sup>3</sup> The ionic radii used in the COSMO are 1.350, 1.517, 1.700, 1.608, 1.725, 1.85, 1.967, 1.908 Å for H, O, C, N, Cl, Br, I, Zn, respectively. The other parameters are set to default values. The inclusion of COSMO is aimed to improve theoretical data.

The model structure of each compound is extracted from the crystallographic data in CIF format and includes one organic HNH<sup>2+</sup> dication and one adjacent inorganic ZnX<sub>4</sub><sup>2-</sup> anion. Then the model is optimized without constraints at the level of PBE/TZP. The molecular orbitals shown in Fig. S6 are based on the optimized model structure.

Table S1. Selected bond lengths [Å] and angles [°] for **1** and **1P**

|                 | <b>1</b>   |                 | <b>1P</b>  | change upon UV irradiation <sup>a</sup> |
|-----------------|------------|-----------------|------------|-----------------------------------------|
| Zn(1)-I(1)      | 2.6327(11) | Zn(1)-I(1)      | 2.7935(10) | +0.1608                                 |
| Zn(1)-I(2)      | 2.6142(11) | Zn(1)-I(2)      | 2.7758(10) | +0.1616                                 |
| Zn(1)-I(3)      | 2.6158(13) | Zn(1)-I(3)      | 2.7752(10) | +0.1594                                 |
| Zn(1)-I(4)      | 2.6042(14) | Zn(1)-I(4)      | 2.7645(10) | +0.1603                                 |
| C(1)-N(1)       | 1.298(13)  | C(1)-N(1)       | 1.299(14)  | +0.001                                  |
| C(1)-C(2)       | 1.366(13)  | C(1)-C(2)       | 1.366(13)  | 0                                       |
| C(2)-C(3)       | 1.396(13)  | C(2)-C(3)       | 1.405(14)  | +0.009                                  |
| C(2)-C(6)       | 1.475(14)  | C(2)-C(6)       | 1.454(14)  | -0.021                                  |
| C(3)-C(4)       | 1.361(17)  | C(3)-C(4)       | 1.375(17)  | +0.014                                  |
| C(4)-C(5)       | 1.344(14)  | C(4)-C(5)       | 1.380(17)  | +0.036                                  |
| C(5)-N(1)       | 1.317(14)  | C(5)-N(1)       | 1.372(15)  | +0.055                                  |
| C(6)-O(1)       | 1.210(11)  | C(6)-O(1)       | 1.239(12)  | +0.029                                  |
| C(6)-N(2)       | 1.350(12)  | C(6)-N(2)       | 1.352(13)  | +0.002                                  |
| N(2)-N(3)       | 1.407(13)  | N(2)-N(3)       | 1.344(14)  | -0.063                                  |
| I(2)-Zn(1)-I(1) | 105.12(4)  | I(2)-Zn(1)-I(1) | 102.55(3)  | -2.57                                   |
| I(2)-Zn(1)-I(3) | 108.15(5)  | I(2)-Zn(1)-I(3) | 106.78(3)  | -1.37                                   |
| I(3)-Zn(1)-I(1) | 110.36(4)  | I(3)-Zn(1)-I(1) | 110.16(3)  | -0.20                                   |
| I(4)-Zn(1)-I(1) | 110.13(5)  | I(4)-Zn(1)-I(1) | 110.71(3)  | +0.58                                   |
| I(4)-Zn(1)-I(2) | 112.77(5)  | I(4)-Zn(1)-I(2) | 116.06(3)  | +4.71                                   |
| I(4)-Zn(1)-I(3) | 110.18(4)  | I(4)-Zn(1)-I(3) | 110.24(3)  | +0.06                                   |
| C(1)-C(2)-C(3)  | 116.8(10)  | C(1)-C(2)-C(3)  | 116.8(9)   | 0                                       |
| C(1)-C(2)-C(6)  | 117.5(8)   | C(1)-C(2)-C(6)  | 117.9(8)   | +0.4                                    |
| C(3)-C(2)-C(6)  | 125.6(9)   | C(3)-C(2)-C(6)  | 125.2(9)   | -0.4                                    |
| C(4)-C(3)-C(2)  | 120.2(10)  | C(4)-C(3)-C(2)  | 121.0(10)  | +0.8                                    |
| C(5)-C(4)-C(3)  | 119.4(11)  | C(5)-C(4)-C(3)  | 118.7(11)  | -0.7                                    |
| N(1)-C(1)-C(2)  | 120.5(9)   | N(1)-C(1)-C(2)  | 122.4(9)   | +1.9                                    |
| N(1)-C(5)-C(4)  | 119.3(12)  | N(1)-C(5)-C(4)  | 118.6(10)  | -0.7                                    |
| N(2)-C(6)-C(2)  | 119.0(9)   | N(2)-C(6)-C(2)  | 118.1(8)   | -0.9                                    |
| O(1)-C(6)-N(2)  | 119.8(11)  | O(1)-C(6)-N(2)  | 119.8(10)  | 0                                       |
| O(1)-C(6)-C(2)  | 121.2(9)   | O(1)-C(6)-C(2)  | 121.9(9)   | +0.7                                    |
| C(1)-N(1)-C(5)  | 123.7(9)   | C(1)-N(1)-C(5)  | 122.3(9)   | -1.4                                    |
| C(6)-N(2)-N(3)  | 117.7(9)   | C(6)-N(2)-N(3)  | 119.1(10)  | +1.4                                    |

<sup>a</sup>(+) and (-) denote an expansion and a contraction in the bond lengths and angles upon UV irradiation, respectively.

As shown in Table S2, compound **1** can retain structural integrity after light irradiation. The slight increase of bond lengths of Zn–I can be attributed to the photoinduced electron transfer from  $\text{ZnI}_4^{2-}$  anion to  $\text{HNH}^{2+}$  dication<sup>4</sup> and consequent weakening of bond energy of Zn–I.

Table S2. Selected bond lengths [ $\text{\AA}$ ] and angles [ $^\circ$ ] for **2** and **3**

| Compound 2        |           | Compound 3        |           |
|-------------------|-----------|-------------------|-----------|
| Zn(1)-Br(1)       | 2.4070(9) | Zn(1)-Cl(1)       | 2.2544(8) |
| Zn(1)-Br(2)       | 2.4114(9) | Zn(1)-Cl(2)       | 2.2792(8) |
| Zn(1)-Br(3)       | 2.4128(8) | Zn(1)-Cl(3)       | 2.2716(8) |
| Zn(1)-Br(4)       | 2.4058(9) | Zn(1)-Cl(4)       | 2.2714(7) |
| Br(1)-Zn(1)-Br(2) | 106.48(3) | Cl(1)-Zn(1)-Cl(2) | 107.02(4) |
| Br(1)-Zn(1)-Br(3) | 110.79(3) | Cl(1)-Zn(1)-Cl(3) | 111.71(3) |
| Br(2)-Zn(1)-Br(3) | 108.53(3) | Cl(1)-Zn(1)-Cl(4) | 110.54(3) |
| Br(4)-Zn(1)-Br(1) | 110.20(3) | Cl(3)-Zn(1)-Cl(2) | 108.25(3) |
| Br(4)-Zn(1)-Br(2) | 110.98(3) | Cl(4)-Zn(1)-Cl(2) | 110.22(3) |
| Br(4)-Zn(1)-Br(3) | 109.80(3) | Cl(4)-Zn(1)-Cl(3) | 109.06(3) |

Table S3 Hydrogen bonds for 1-3 (Å and °)

| D-H...A           | d(D-H) | d(H...A) | d(D...A)  | <(DHA) |
|-------------------|--------|----------|-----------|--------|
| <b>Compound 1</b> |        |          |           |        |
| N1-H1... I4#1     | 0.86   | 2.62     | 3.467(7)  | 169.3  |
| N2-H2... I1#3     | 0.86   | 3.17     | 3.712(8)  | 123.5  |
| N2-H2... I2#3     | 0.86   | 2.99     | 3.708(9)  | 142.9  |
| N3-H3A... O2#4    | 0.89   | 2.41     | 3.093(14) | 134.2  |
| N3-H3B... O2#3    | 0.89   | 1.96     | 2.752(11) | 148.2  |
| N3-H3C ... O1#4   | 0.89   | 2.19     | 2.881(12) | 133.8  |
| N3-H3C... I3      | 0.89   | 3.27     | 3.911(10) | 130.9  |
| O2-H6... I3       | 0.99   | 2.70     | 3.654(7)  | 161.1  |
| O2-H7... I1#5     | 0.99   | 3.03     | 3.782(7)  | 134.0  |
| O2-H7... I2#6     | 0.99   | 2.94     | 3.629(8)  | 128.0  |
| <b>Compound 2</b> |        |          |           |        |
| N1-H1 ... Br4     | 0.86   | 2.38     | 3.225(5)  | 167.8  |
| N2-H2... Br1#4    | 0.86   | 3.07     | 3.527(5)  | 115.8  |
| N2-H2... Br2#4    | 0.86   | 2.74     | 3.497(5)  | 147.0  |
| N3-H3A ... Br3#2  | 0.89   | 2.84     | 3.556(7)  | 138.1  |
| N3-H3A... Br3#3   | 0.89   | 2.84     | 3.516(7)  | 133.9  |
| N3-H3B... O2#4    | 0.89   | 1.82     | 2.705(7)  | 176.5  |
| N3-H3C... O1 #3   | 0.89   | 2.36     | 2.872(7)  | 116.5  |
| N3-H3C... Br1 #5  | 0.89   | 3.10     | 3.655(6)  | 122.1  |
| O2-H6... Br2 #6   | 0.73   | 2.79     | 3.476(5)  | 155.5  |
| O2-H7... Br3      | 0.74   | 2.75     | 3.450(5)  | 159.3  |
| <b>Compound 3</b> |        |          |           |        |
| N1-H1... Cl4#1    | 0.86   | 2.26     | 3.094(3)  | 162.7  |
| N2-H2...Cl2#3     | 0.86   | 2.55     | 3.332(3)  | 151.0  |
| N3-H3A... Cl3#5   | 0.89   | 2.68     | 3.322(3)  | 130.1  |
| N3-H3A... Cl3#4   | 0.89   | 2.58     | 3.331(3)  | 142.0  |
| N3-H3B... O2#5    | 0.89   | 1.80     | 2.688(4)  | 176.1  |
| N3-H3C... O1#6    | 0.89   | 2.27     | 2.847(4)  | 122.0  |



|                 |      |      |          |       |
|-----------------|------|------|----------|-------|
| N3-H3C... C11#7 | 0.89 | 2.86 | 3.464(3) | 126.9 |
| O2-H6... Cl2    | 0.97 | 2.36 | 3.321(3) | 171.8 |
| O2-H7... Cl3#7  | 0.97 | 2.38 | 3.342(3) | 170.8 |

Symmetry code: for **1**: #1 x-1, y, z; #2 x, -y+1/2, z-1/2; #3 x, y, z-1; #4 -x+1, -y+1, -z+1; #5 -x+1, -y+1, -z+2; #6 -x+2, -y+1, -z+2. for **2**: #1 x+1, -y+3/2, z-1/2; #2 x+1, y, z; #3 -x+2, -y+1, -z+1; #4 x+1, y, z-1; #5 -x+1, -y+1, -z+1; #6 -x+1, -y+1, -z+2. for **3**: #1 x, y, z+1; #2 x+1, -y+3/2, z+1/2; #3 x+1, y, z; #4 x+1, y, z+1; #5 -x+2, -y+1, -z+1; #6 -x+2, -y+1, -z+2; #7 -x+1, -y+1, -z+1.

## References

- (a) B. Delley, *J. Chem. Phys.*, 1990, **92**, 508–517; (b) B. Delley, *J. Chem. Phys.*, 2000, **113**, 7756–7764.
- (a) C. Chang, M. Pelissier and M. Durand, *Phys. Scr.*, 1986, **34**, 394–404; (b) E. van Lenthe, E. J. Baerends and J. G. Snijders, *J. Chem. Phys.*, 1993, **99**, 4597–4610; (c) E. van Lenthe, R. van Leeuwen, E. J. Baerends and J. G. Snijders, *Int. J. Quantum Chem.*, 1996, **57**, 281–293; (d) E. van Lenthe, A. E. Ehlers and E. J. Baerends, *J. Chem. Phys.*, 1999, **110**, 8943–8953.
- (a) A. Klamt and G. Schüümann, *J. Chem. Soc., Perkin Trans.*, 1993, **2**, 799–805; (b) A. Klamt, *J. Chem. Phys.*, 1995, **99**, 2224–2235.
- (a) J. J. Shen, X. X. Li, T. L. Yu, F. Wang, P. F. Hao and Y. L. Fu, *Inorg. Chem.*, 2016, **55**, 8271–8273; (b) J. J. Shen, F. Wang, X. X. Li, T. L. Yu, P. F. Hao and Y. L. Fu, *RSC Adv.*, 2016, **6**, 98916–98920.
